# Supplementary material
Source: HighWire-hosted journal article supplement (https://www.jneurosci.org/content/40/36/6854)
Supplement: inline-supplementary-material-11 [file inline-supplementary-material-11.docx]

Figure 4-5 Extended data and statistics for Figure 4K.

|  | PSD95/GAPDH | GluR1/PSD95 | (GluR2/3)/ PSD95 |
| --- | --- | --- | --- |
| C | 1.11 ± 0.13 | 0.96 ± 0.03 | 1.16 ± 0.15 |
| KO | 0.97 ± 0.07 | 1.06 ± 0.06 | 1.12 ± 0.12 |
| Stats | t(10) = 0.9338  p = 0.3724 | t(10) = 1.085  p = 0.3036 | t-test; t(10) = 0.1792  p = 0.8613 |
